# Supplementary material
Source: PubMed Central journal article supplement (PMC6137677)

## **Online Data Supplement**

### **Prognostic Significance of Large Airway Dimensions on Computed Tomography in the General Population: The Multi-Ethnic Study of Atherosclerosis (MESA) Lung Study**

Elizabeth C. Oelsner, MD, Benjamin M. Smith, MD, Eric A. Hoffman, PhD, Ravi Kalhan, MD, Kathleen M Donohue, MD, Joel D. Kaufman, MD, Jennifer N. Nguyen, MS, Ani W. Manichaikul, PhD, Jerome I. Rotter, MD, Erin D. Michos, MD, David R Jacobs, Jr, MD, Gregory L. Burke, MD, Aaron R. Folsom, MD, Joseph E. Schwartz, PhD, Karol Watson, MD, R. Graham Barr, MD

**Table E1.** Associations Between Pi10 and Incident Pre-Bronchodilator Airflow Limitation, Defined by the Lower-Limit-of-Normal, Over Five Years of Follow-up in MESA-Lung Participants Without Initial Airflow Limitation or Prevalent Clinical Chronic Lower Respiratory Disease.

| N = 1,830*            | <b>Incident airflow limitation<sup>†</sup></b> |         |
|-----------------------|------------------------------------------------|---------|
| Model <sup>‡</sup>    | OR per SD <sup>§</sup> of pi10 (95% CI)        | P-value |
| Crude                 | 1.32 (0.95, 1.85)                              | .096    |
| Partially-adjusted    | 1.51 (1.05, 2.17)                              | .025    |
| Fully-adjusted        | 1.80 (1.17, 2.77)                              | .008    |
| Genetic risk-adjusted | 1.91 (1.20, 3.05)                              | .007    |
| FEV1-Adjusted         | 1.90 (1.16, 3.12)                              | .011    |

B = beta estimate is mL per year per SD increment of pi10. CI = confidence interval. FEV1 = forced expiratory volume in one second. OR = odds ratio. SD = standard deviation.

\*All models exclude participants with prevalent clinical chronic lower respiratory disease, defined as self-reported asthma or emphysema and/or inhaler use at study baseline, as well as those with airflow limitation (FEV1/FVC<0.7) on initial pre-bronchodilator spirometry in 2004-06 and those without valid pre-bronchodilator spirometry in 2010-12.

<sup>†</sup>Incident airflow limitation was defined as FEV1/FVC<lower-limit-of-normal on pre-bronchodilator spirometry in 2010-12, which was present in 34 cases, and analyzed by logistic regression models.

<sup>‡</sup>Models were adjusted for age, sex, race/ethnicity, height and weight (partially-adjusted); smoking status, packyears, voxel size, CT scanner type, and percent emphysema (fully-adjusted). The genetic risk-adjusted model is additionally adjusted for principal components of genetic ancestry (in the place of self-reported race/ethnicity) and COPD genetic risk score. The FEV1-adjusted model was additionally adjusted for the FEV1 percent predicted at the initial spirometry exam. Models adjusted for the genetic risk score and the initial FEV1 were limited to N=1,762, events = 33.

<sup>§</sup>Results are per standard deviation of log-transformed pi10 (one SD = 0.057 on the log-scale).

**Table E2.** Associations Between Pi10 and Decline in Lung Function Over Five Years of Follow-up in MESA-Lung Participants Without Initial Airflow Limitation or Prevalent Clinical Chronic Lower Respiratory Disease, Including Those Lost-To-Follow-Up.

| Model <sup>‡</sup>    | Annual decline in FEV1 (mL) <sup>†</sup> |         |
|-----------------------|------------------------------------------|---------|
|                       | B per SD <sup>§</sup> (95% CI)           | P-value |
| Unadjusted            | -2.45 (-4.32, -0.58)                     | .010    |
| Partially-adjusted    | -2.46 (-4.27, -0.65)                     | .008    |
| Fully-adjusted        | -2.35 (-4.16, -0.55)                     | .011    |
| Genetic risk-adjusted | -2.53 (-4.40, -0.66)                     | .008    |
| FEV1-Adjusted         | -2.65 (-4.63, -0.67)                     | .009    |

B = beta estimate is mL per year per SD increment of pi10. CI = confidence interval. FEV1 = forced expiratory volume in one second. OR = odds ratio. SD = standard deviation.

\*All models exclude participants with prevalent clinical chronic lower respiratory disease, defined as self-reported asthma or emphysema and/or inhaler use at study baseline, as well as those with airflow limitation (FEV1/FVC<0.7) on initial pre-bronchodilator spirometry in 2004-06.

<sup>†</sup>FEV1 was measured on pre-bronchodilator spirometry in 2004-06 and 2010-12. Annual decline in FEV1 was analyzed by random-intercept mixed models including all available data from both spirometry exams, including data N=2,687 with initial lung function, of whom N=857 were lost-to-follow-up and N=1,830 underwent repeated lung function measurement.

<sup>‡</sup>Models were adjusted for age, sex, race/ethnicity, height\* and weight\* (partially-adjusted); smoking status,\* packyears,\* voxel size, CT scanner type, and percent emphysema (fully-adjusted); asterisks (\*) denote time-varying covariates in the mixed models. The genetic risk-adjusted model is additionally adjusted for principal components of genetic ancestry (in the place of self-reported race/ethnicity) and COPD genetic risk score. The FEV1-adjusted model was additionally adjusted for the FEV1 percent predicted at the initial spirometry exam. Models adjusted for the genetic risk score and the initial FEV1 were limited to N=1,762.

<sup>§</sup>Results are per standard deviation of log-transformed pi10 (one SD = 0.058 on the log-scale).

**Table E3.** Pi10 and Cause-specific Risks of Incident Chronic Lower Respiratory Disease (CLRD) Hospitalization, CLRD Mortality, and Non-CLRD Mortality, Over Fourteen Years of Follow-Up in Participants Without Prevalent CLRD.

| N=6,029*                  | CLRD Hospitalization               |         | CLRD Mortality                     |         | Non-CLRD Mortality                 |         |
|---------------------------|------------------------------------|---------|------------------------------------|---------|------------------------------------|---------|
| N, Events                 | 68                                 |         | 16                                 |         | 962                                |         |
| Model <sup>†</sup>        | HR per SD <sup>§</sup><br>(95% CI) | P-value | HR per SD <sup>§</sup><br>(95% CI) | P-value | HR per SD <sup>§</sup><br>(95% CI) | P-value |
| Cause-specific risk model | 1.39 (1.19, 1.62)                  | <.0001  | 1.41 (0.97, 2.06)                  | .076    | 1.02 (0.95, 1.10)                  | .36     |
| Competing risk model      | 1.41 (1.25, 1.58)                  | <.0001  | 1.41 (1.10, 1.81)                  | .007    | 1.01 (0.93, 1.10)                  | .79     |

CI = confidence interval. CLRD = chronic lower respiratory disease. Cum Inc = cumulative incidence. HR = hazard ratio. SD = standard deviation.

\*Excludes participants with prevalent chronic lower respiratory disease, defined as self-reported asthma or emphysema and/or inhaler use at study baseline.

<sup>†</sup>CLRD Events are defined by the primary discharge diagnosis or underlying cause of asthma (ICD-9 493, ICD-10 J45-6), COPD (ICD-9 496, ICD-10 J44), chronic bronchitis (ICD-9 490-1, ICD-10 J40-2); or emphysema (ICD-9 492, ICD-10 J43).

<sup>‡</sup>The fully adjusted model includes age, sex, race/ethnicity, body mass index, smoking status, pack-years, percent emphysema, voxel size, and CT scanner type.

<sup>§</sup>HRs are per standard deviation of log-transformed pi10 (one SD = 0.064 on the log-scale).

**Figure E1.** Stratified Associations Between Pi10 and Risk of First Hospitalization or Mortality due to Chronic Lower Respiratory Disease (CLRD) over Fourteen Years of Follow-Up in Participants Without Prevalent Clinical CLRD, With 95% Confidence Intervals.

Fully-adjusted models include age, sex, race/ethnicity, body mass index, smoking status, pack-years, percent emphysema, voxel size, and CT scanner type. Results are per standard deviation of log-transformed pi10 (one SD = 0.064 on the log-scale).

BMI = body mass index. CT = computed tomography. SD = standard deviation. PM 2.5 = fine particulate matter pollution.

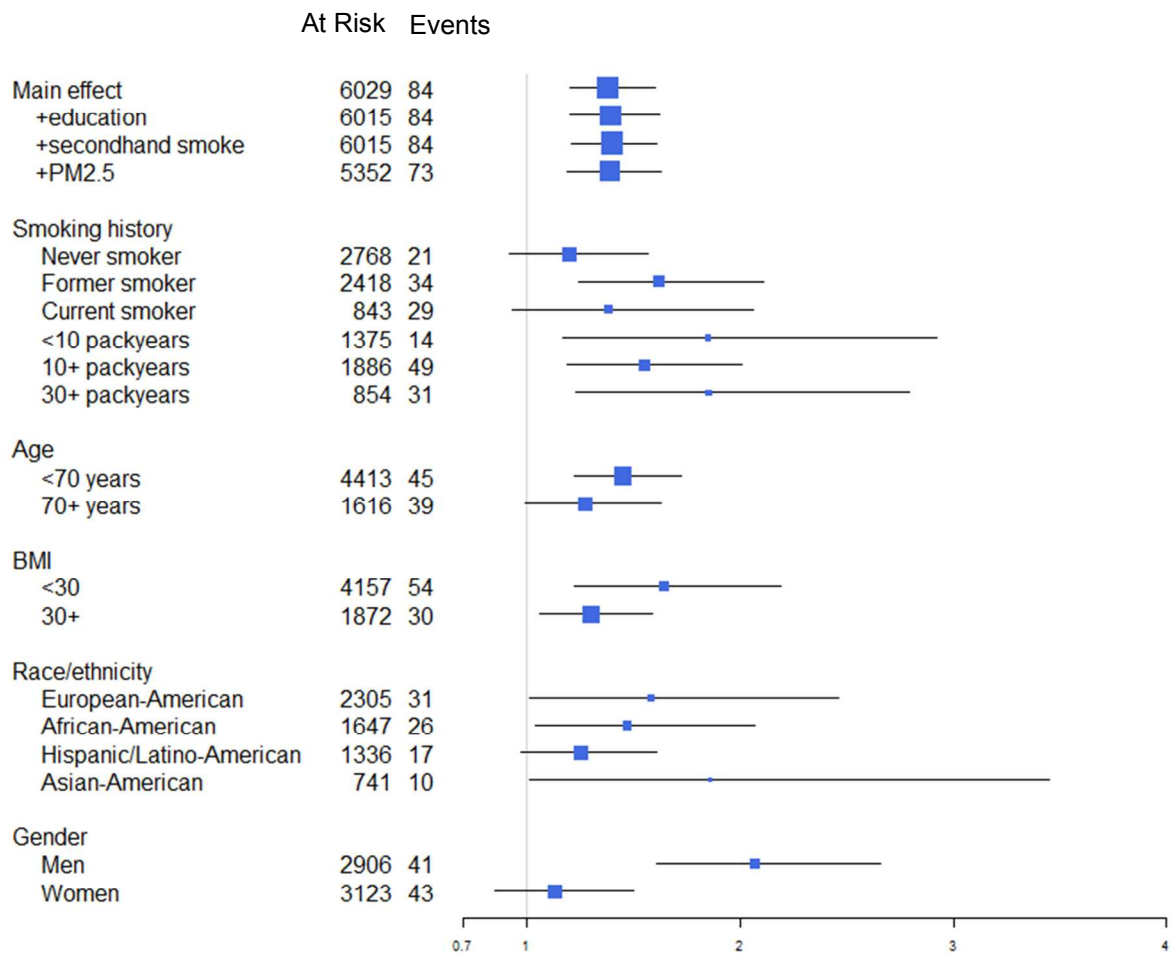

**Figure E2.** Associations Between Pi10, Decline in FEV1, and Risk of First Hospitalization or Mortality due to Chronic Lower Respiratory Disease (CLRD) over Fourteen Years of Follow-Up in Participants Without Prevalent Clinical CLRD, With 95% Confidence Intervals, Stratified by Scanner Type and Site.

Fully-adjusted models include age, sex, race/ethnicity, body mass index, smoking status, pack-years, percent emphysema, voxel size, and CT scanner type. Results are per standard deviation of log-transformed pi10 (site-specific standard deviations used for site-stratified analyses).

EBT = electron beam CT scanner. MDCT = multi-detector CT scanner. SD = standard deviation.

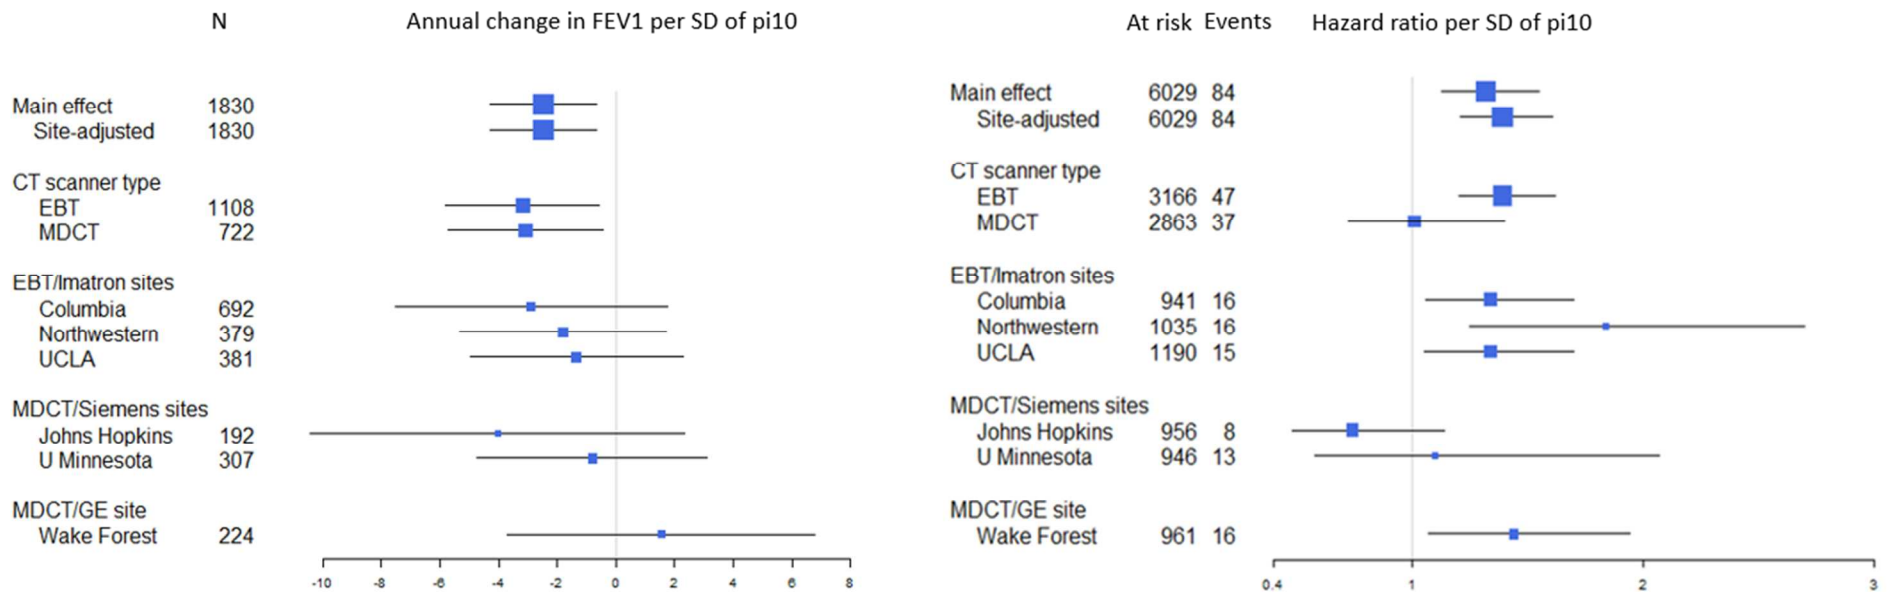

Supplement: AnnalsATS.201710-820OC_oelsner_data_supplement.pdf [file AnnalsATS.201710-820OC_oelsner_data_supplement.pdf]
